# Supplementary material
Source: publisher figshare collection journal article supplement (https://aacr.figshare.com/articles/dataset/_/22480562)

# Supplementary Figure 1

**A**

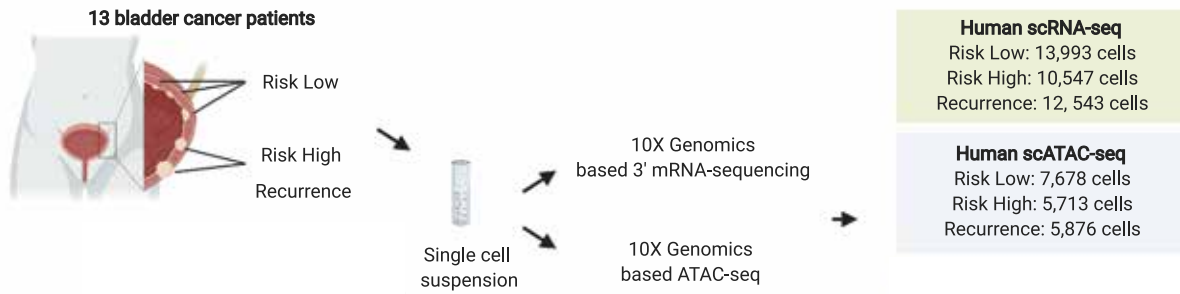

**B**

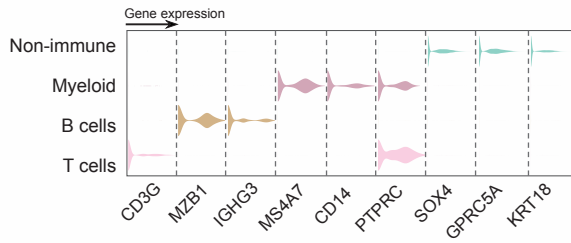

**C**

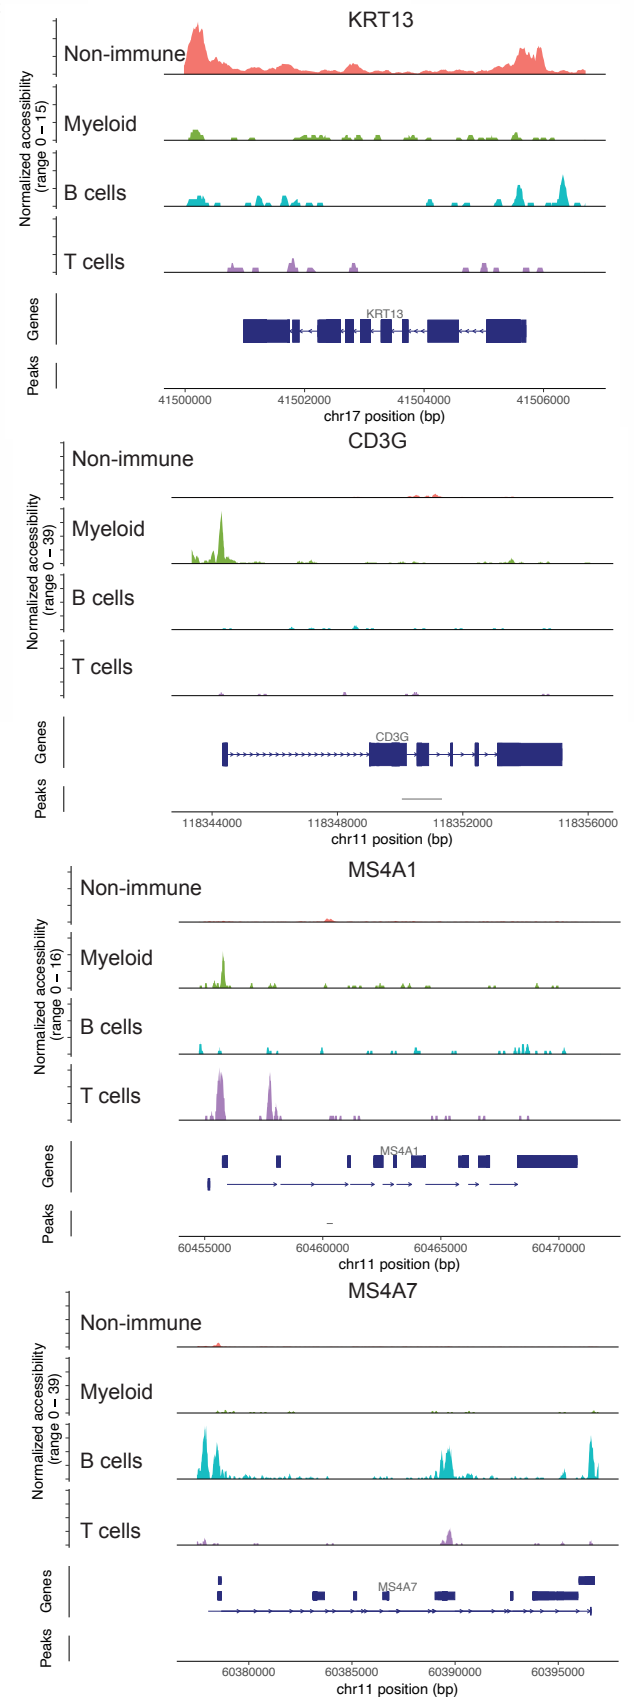

# Supplementary Figure 2

**A**

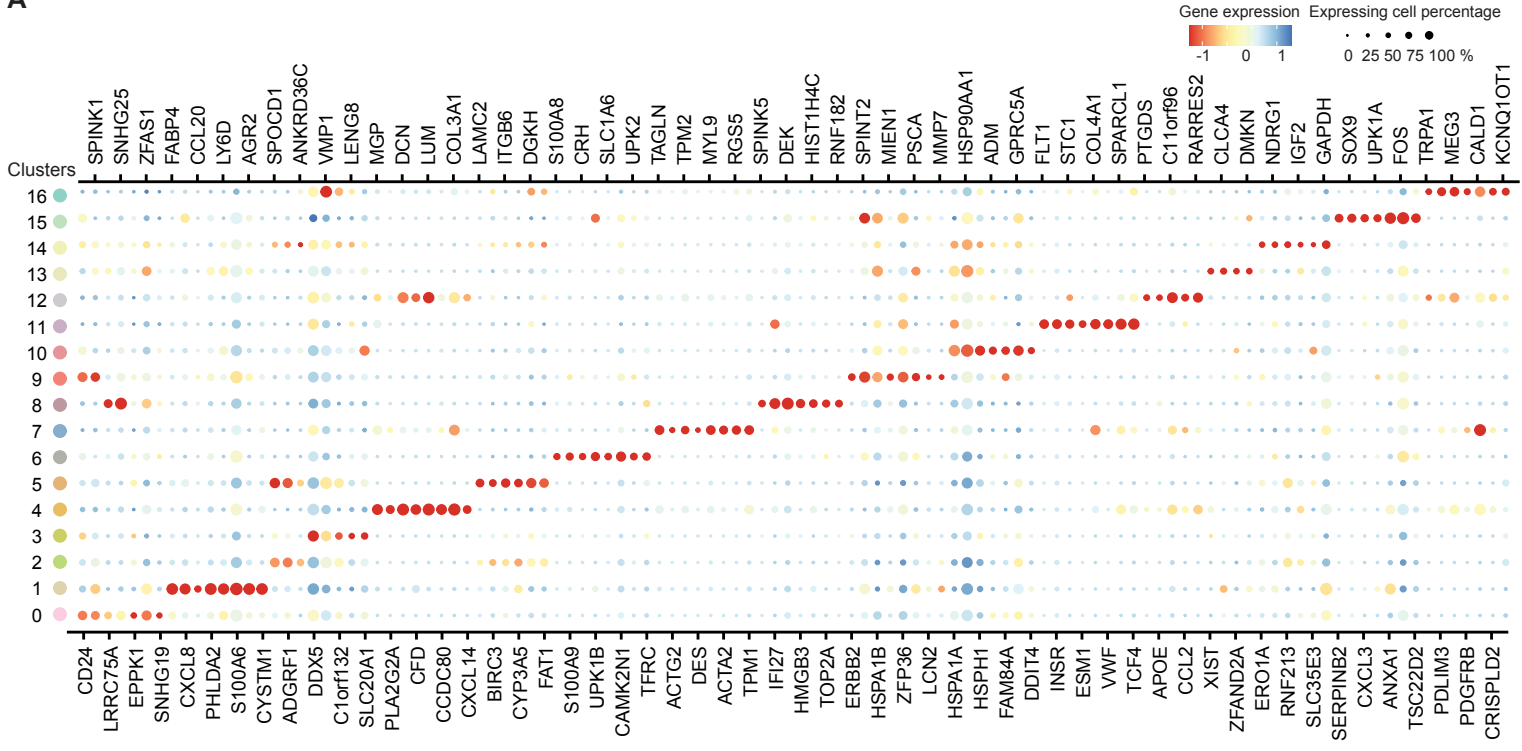

**B**

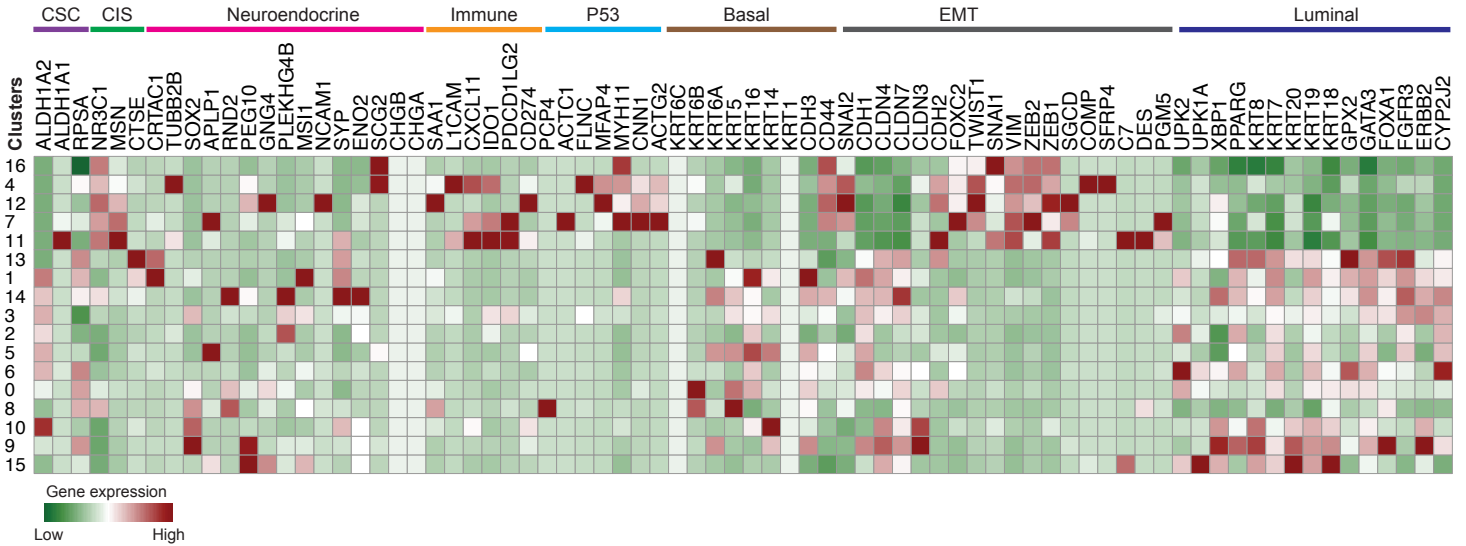

# Supplementary Figure 3

A

scRNA-seq: Pt1 — Pt13

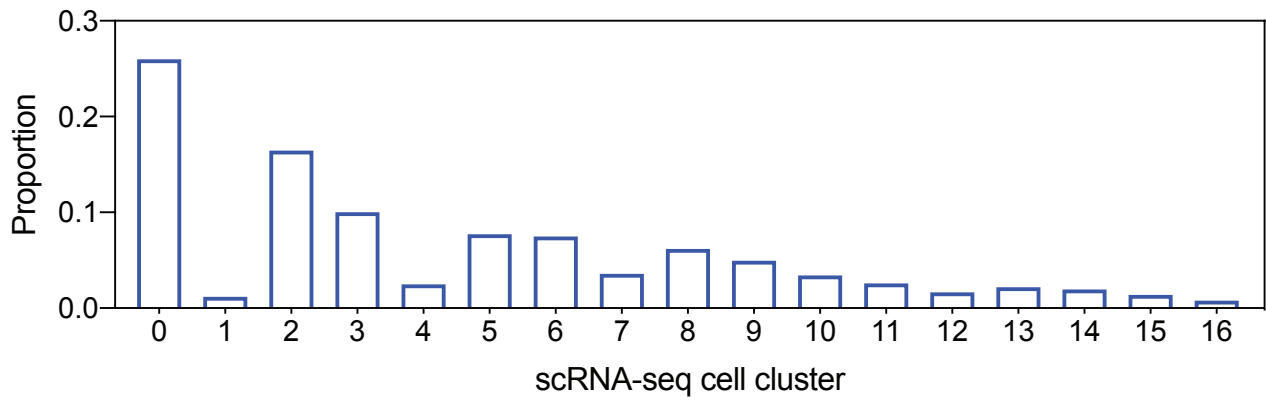

TCGA: BCLA (n = 414)

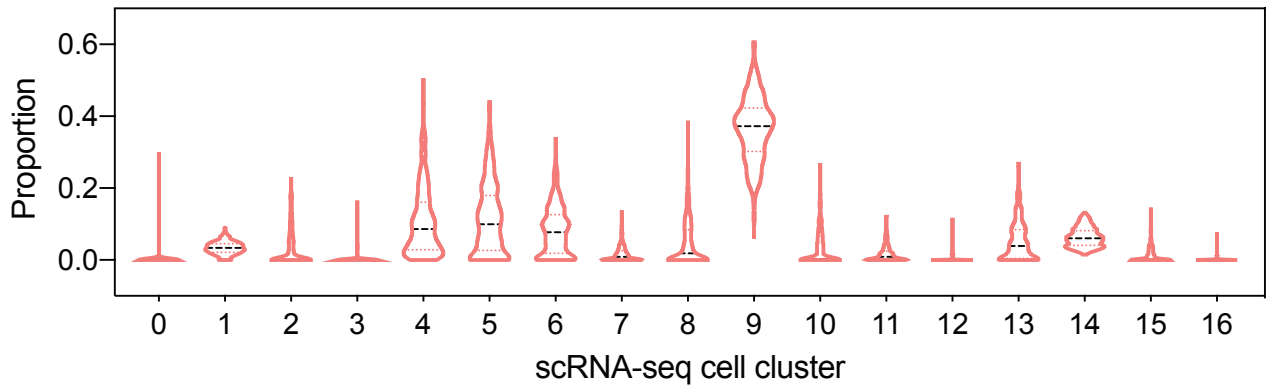

B

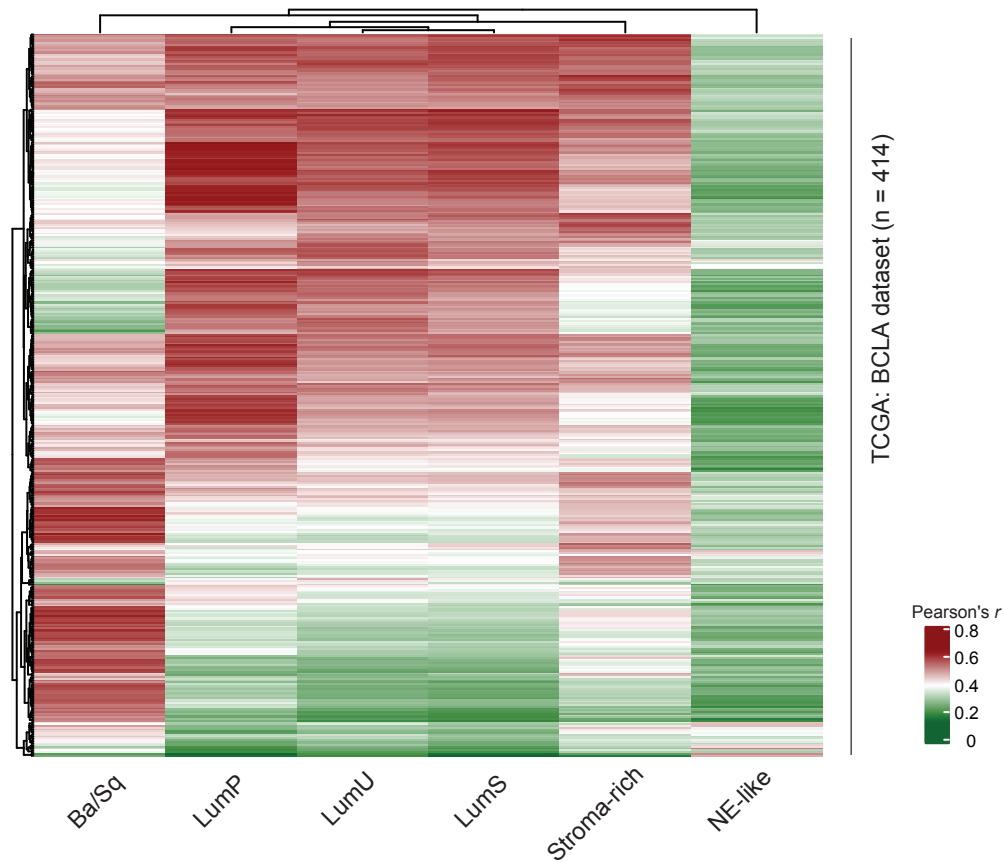

# Supplementary Figure 4

**A**

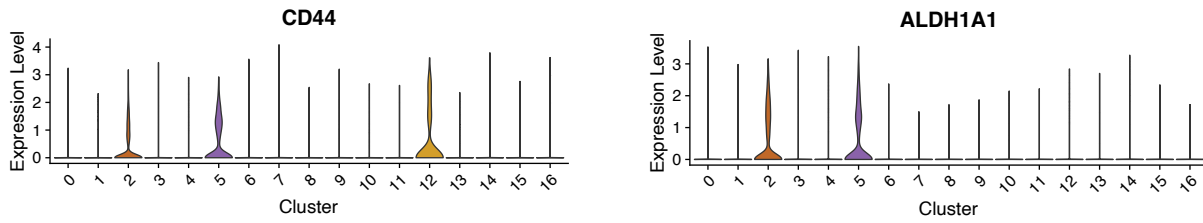

**B**

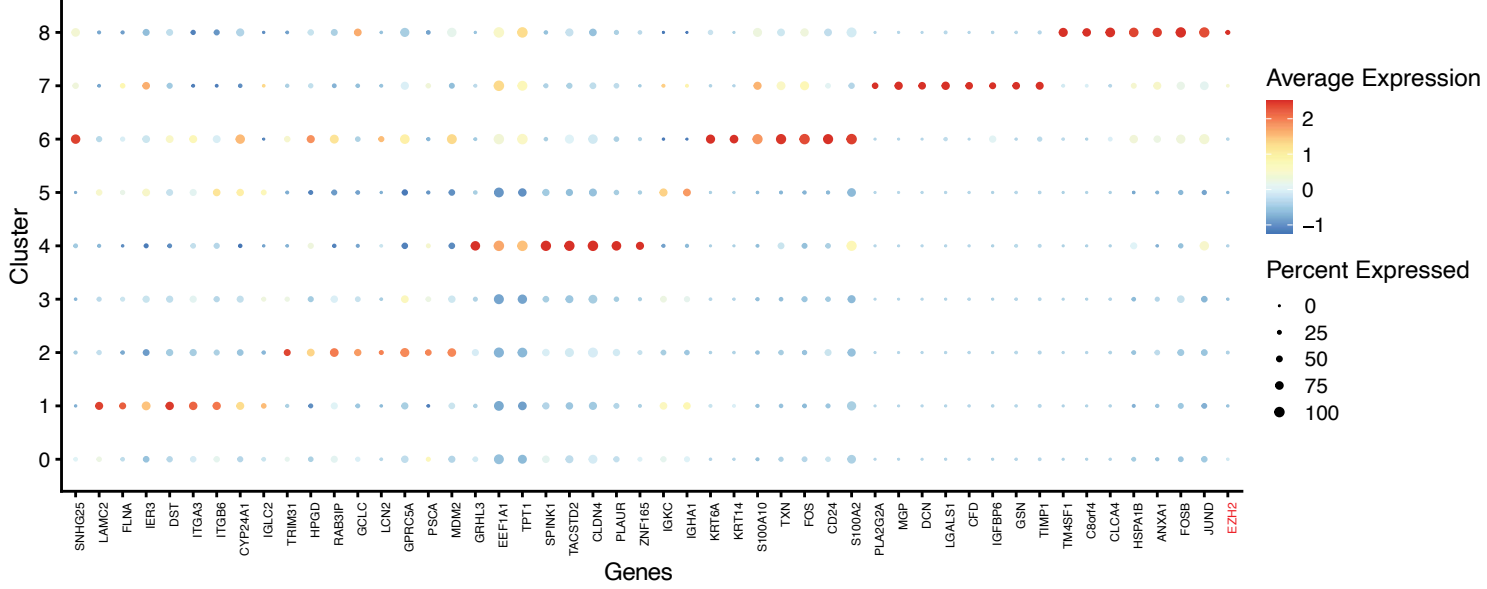

**C**

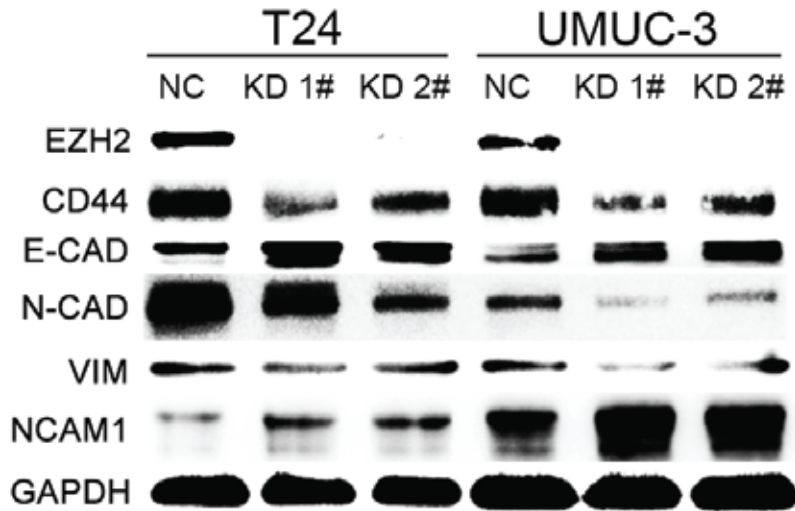

# Supplementary Figure 5

**A**

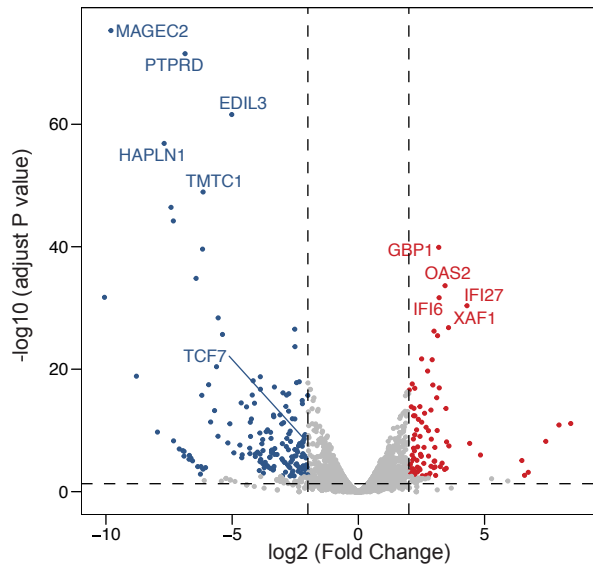

**B**

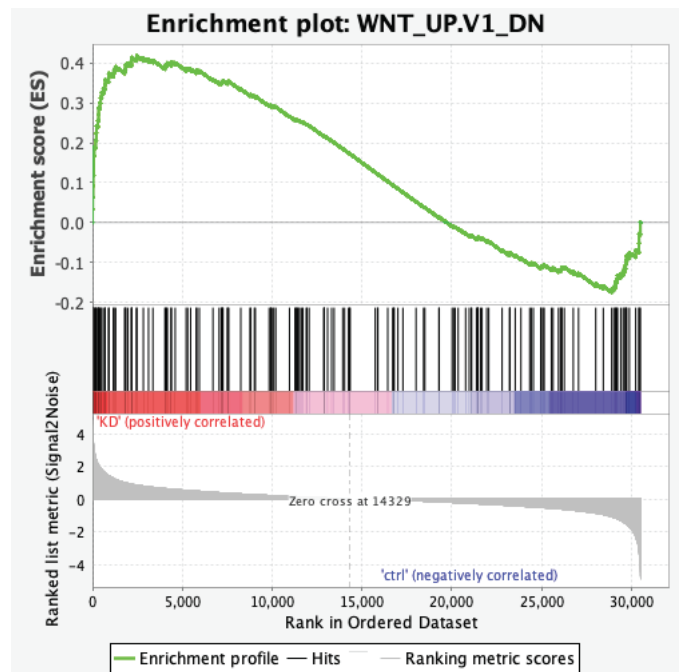

**C**

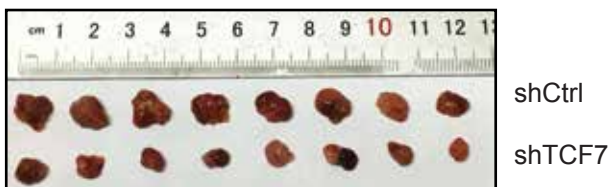

**D**

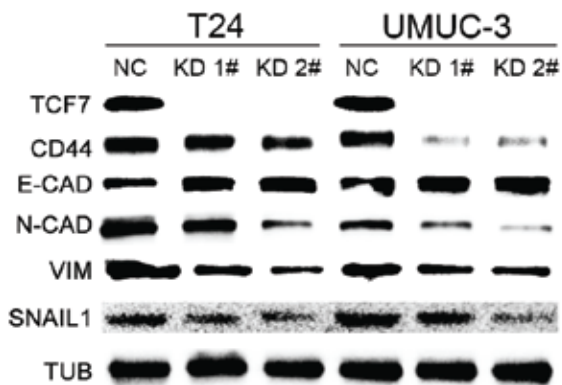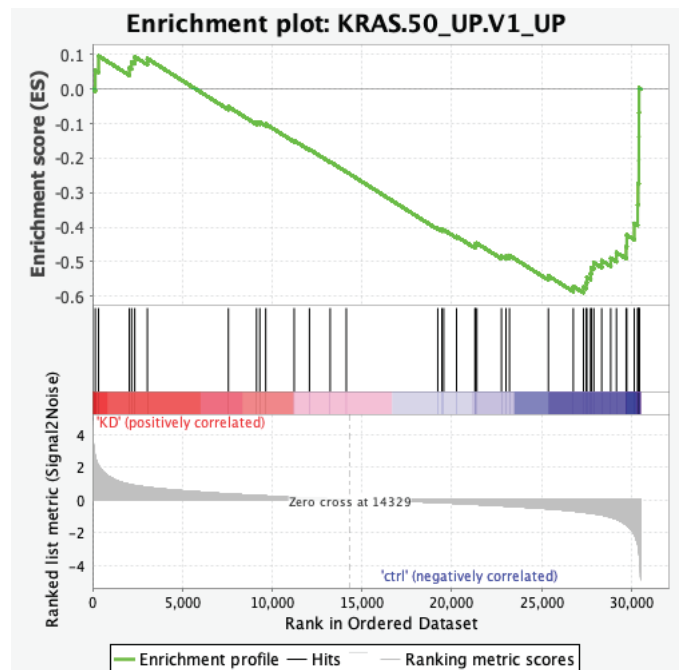

# Supplementary Figure 6

**A**

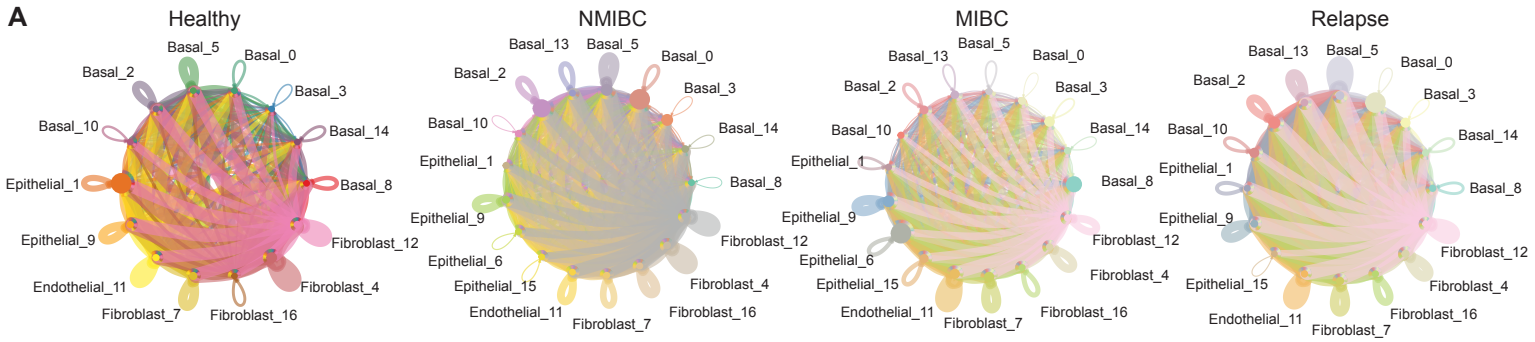

**B**

Outgoing singals

Incoming singals

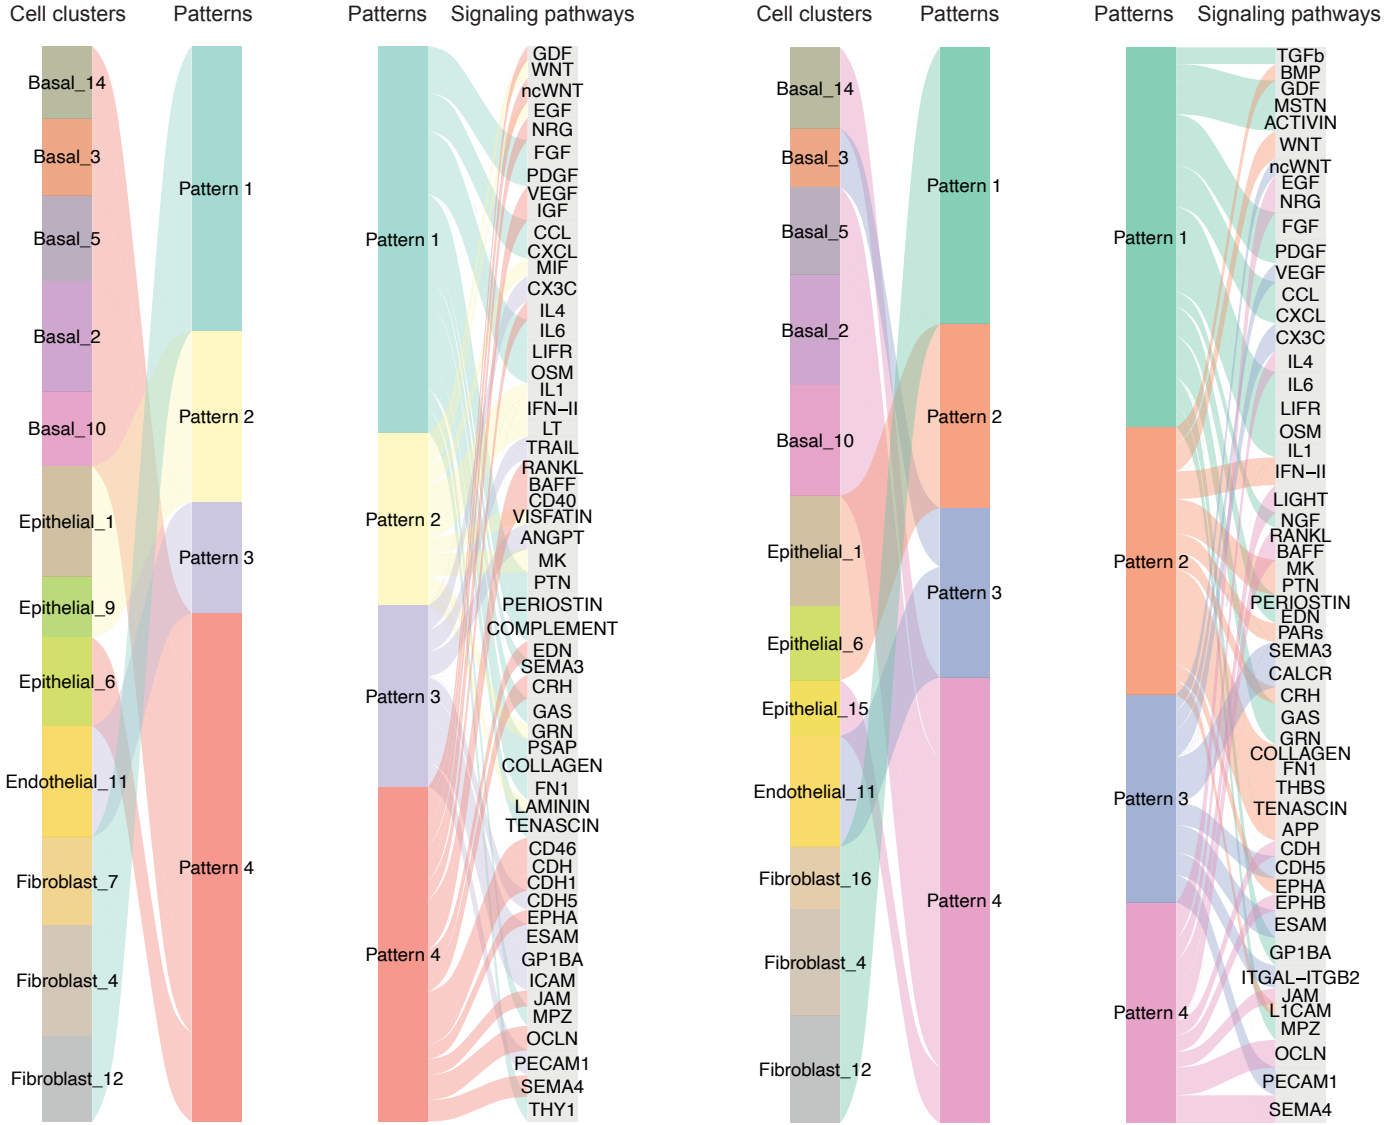

# Supplementary Figure 7

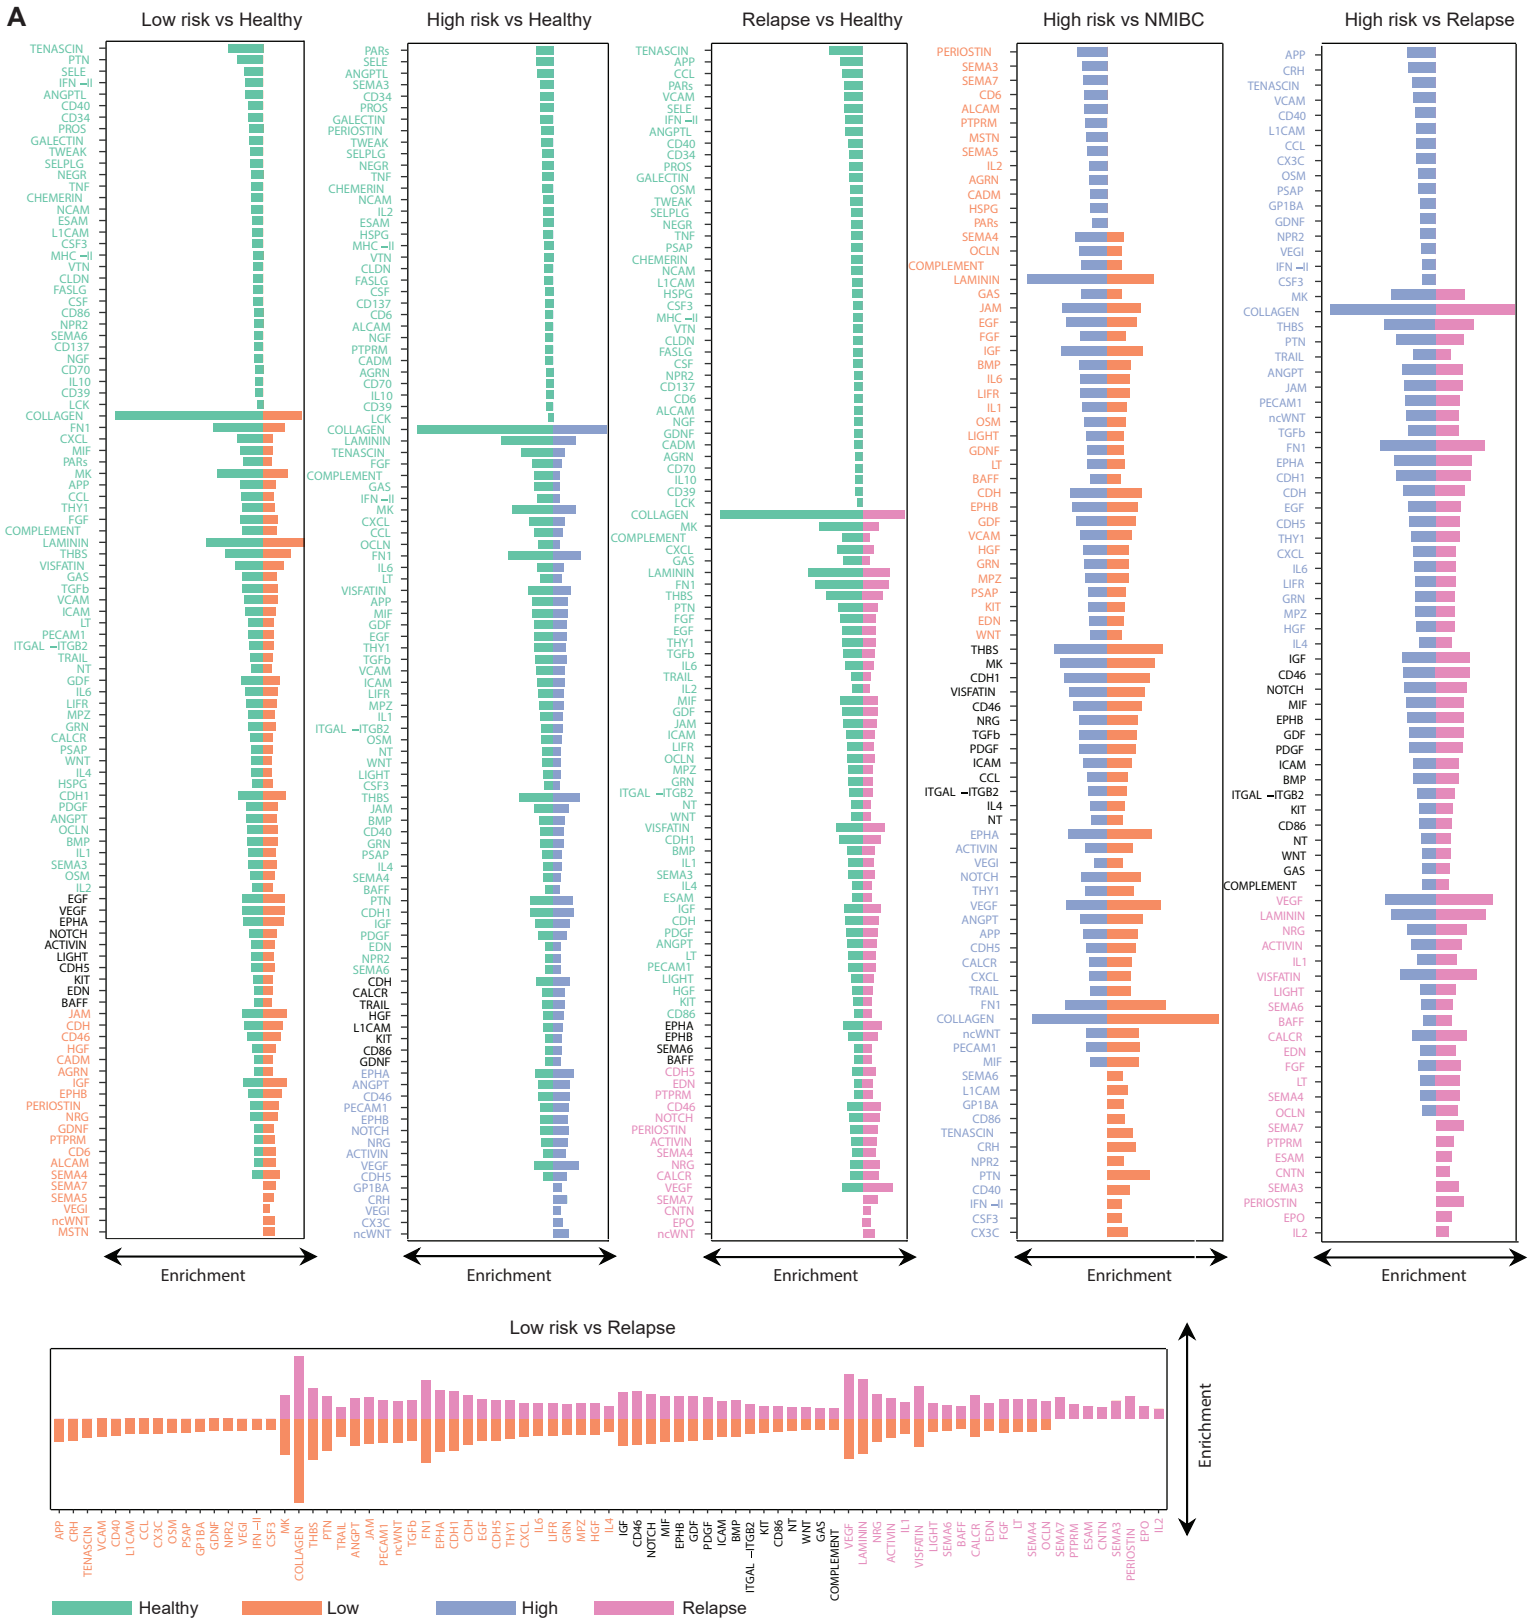

**B** Ligands and receptors involved in cell-cell interactions

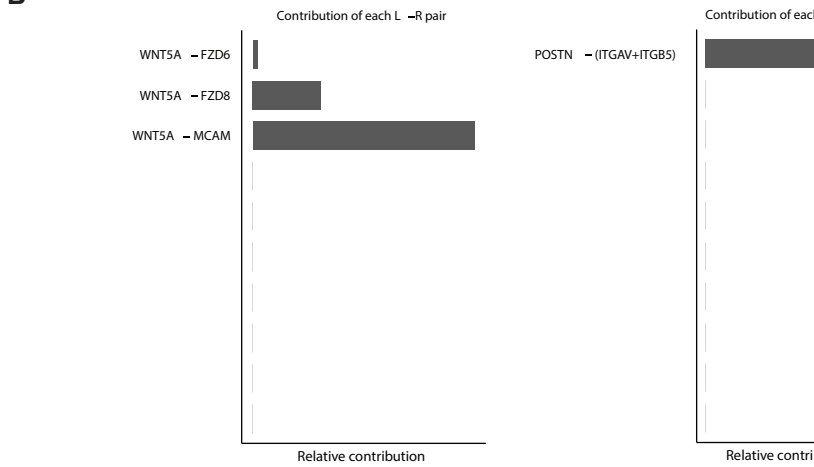

# Supplementary Figure 8

**A**

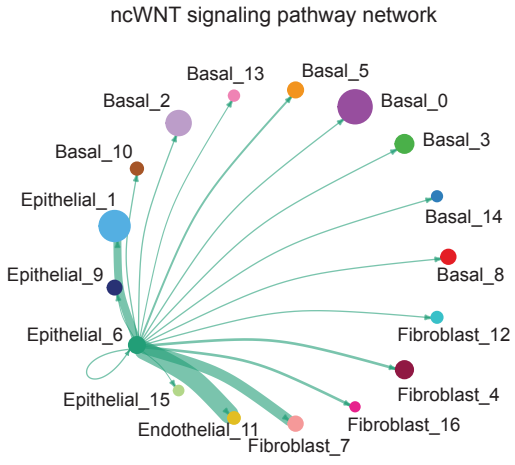

**B**

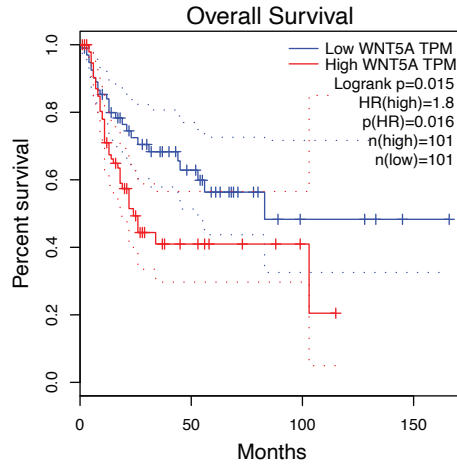

**C**

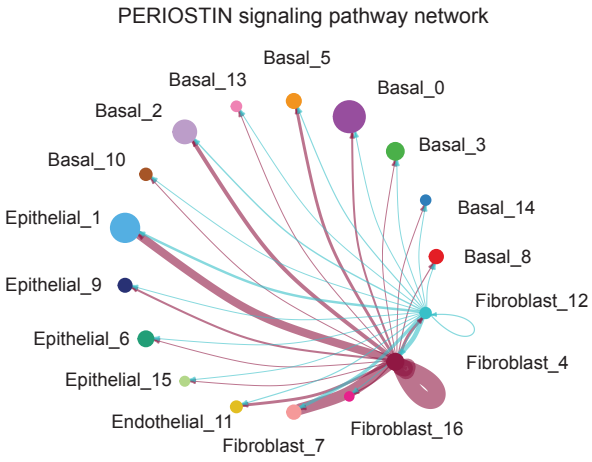

**D**

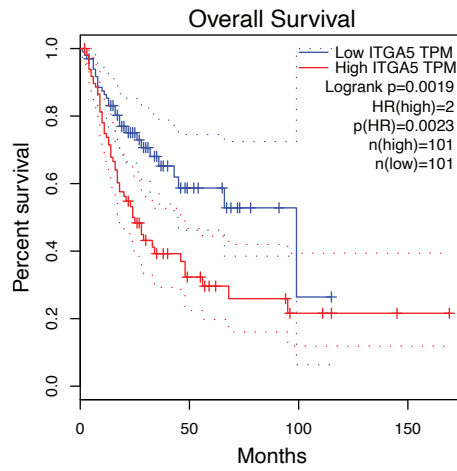

Supplement: Supplementary file 1 [file 39932078]
